# Supplementary material for: Highly Stable, Cold-Active Aldehyde Dehydrogenase from the Marine Antarctic Flavobacterium sp. PL002
Source: MDPI journal article supplement (doi:10.3390/fermentation8010007), 2021-12-27
Supplement: s1 [file s1]

## SUPPLEMENTARY MATERIAL

### **Highly stable cold-active aldehyde dehydrogenase from the marine Antarctic *Flavobacterium* sp. PL002**

Georgiana Necula-Petrareanu<sup>1</sup>, Paris Lavin<sup>2</sup>, Victoria I. Paun<sup>1</sup>, Giulia Roxana Gheorgita<sup>1</sup>,  
Alina Vasilescu<sup>3</sup>, Cristina Purcarea<sup>1\*</sup>

<sup>1</sup>Department of Microbiology, Institute of Biology, 296 Splaiul Independentei, 060031  
Bucharest, Romania

<sup>2</sup>Laboratorio de Complejidad Microbiana y Ecología Funcional, Instituto Antofagasta,  
Universidad de Antofagasta, 601 Angamos Av., Antofagasta, Chile

<sup>3</sup>International Centre of Biodynamics, 1B Intrarea Portocalelor, 060101 Bucharest,  
Romania

\* Corresponding author: [cristina.purcarea@ibiol.ro](mailto:cristina.purcarea@ibiol.ro)

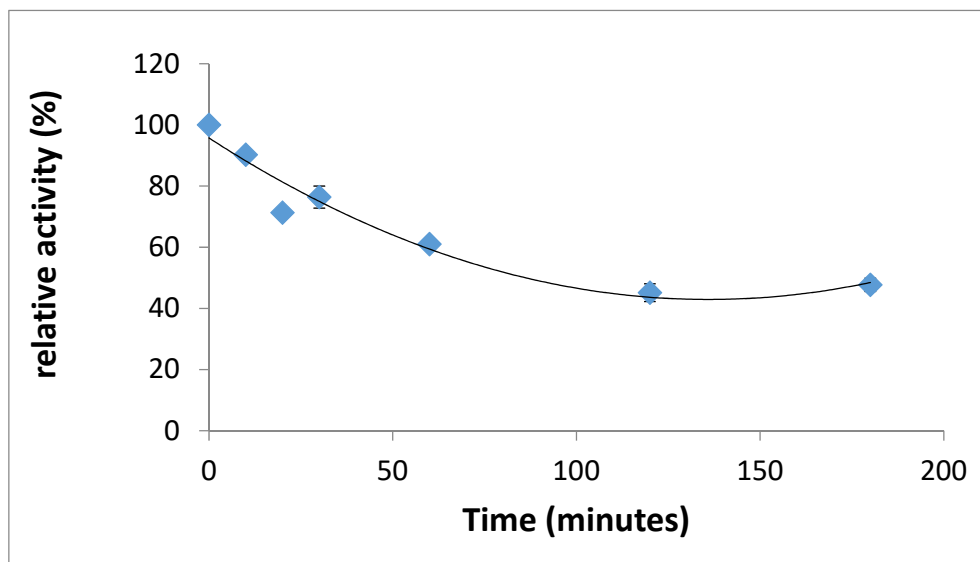

**Figure S1.** Thermal stability of F-ALDH at 50°C. The residual activity of the NAD<sup>+</sup>-dependent reaction was measured at 25°C as described in Methods after enzyme incubation at 50°C for various times up to 3 hours. The relative activity was calculated considering 100% the activity measured in the absence of high temperature incubation.

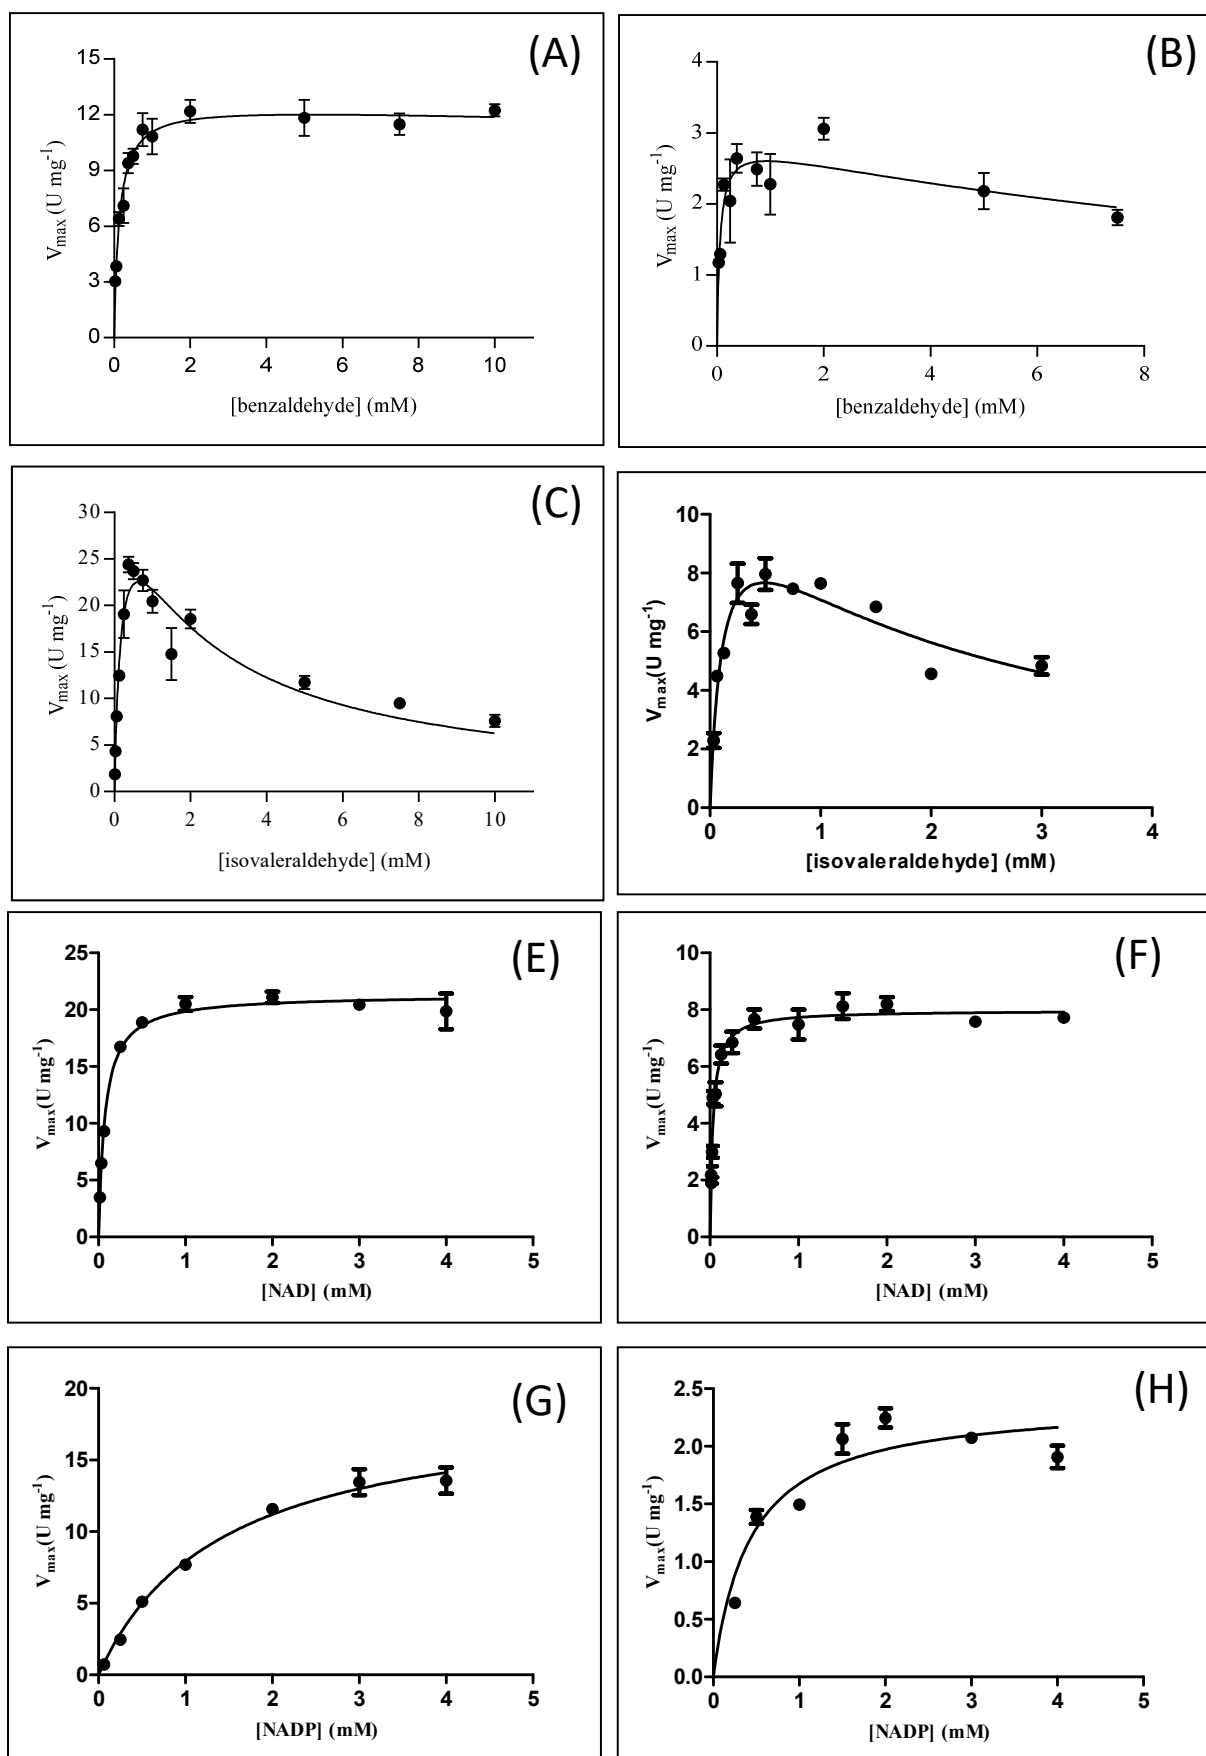

**Figure S2.** Substrate saturation curves of F-ALDH. The ALDH activity was measured at 30°C in the presence of increasing concentrations of (A) isovaleraldehyde and 1 mM NAD<sup>+</sup>; (B) isovaleraldehyde and 1 mM NAD<sup>+</sup>; (C) benzaldehyde and 1 mM NAD<sup>+</sup>; (D) benzaldehyde and 1 mM NADP<sup>+</sup>, as described in Methods.

**Table S1.** Catalytic parameters of bacterial ALDHs

| Organism / Enzyme                          | Substrate / Cofactor                 | $K_M$<br>(mM) | $k_{cat}$<br>(s <sup>-1</sup> ) | $k_{cat} / K_M$<br>(s <sup>-1</sup> mM <sup>-1</sup> ) | Reference                  |
|--------------------------------------------|--------------------------------------|---------------|---------------------------------|--------------------------------------------------------|----------------------------|
| <i>Flavobacterium</i> PL002 / F-ALDH       | Isovaleraldehyde / NAD <sup>+</sup>  | 0.197         | 100.04                          | 507.6                                                  | Current study              |
|                                            | Isovaleraldehyde / NADP <sup>+</sup> | 0.070         | 34.11                           | 487.2                                                  |                            |
|                                            | Benzaldehyde / NAD <sup>+</sup>      | 0.136         | 34.74                           | 255.4                                                  |                            |
|                                            | Benzaldehyde / NADP <sup>+</sup>     | 0.057         | 10.72                           | 188                                                    |                            |
| <i>Flavobacterium frigidimaris</i> / AldDH | Benzaldehyde / NAD <sup>+</sup>      | 82.8          | -                               | -                                                      | Yamanaka, 2002             |
| <i>Pseudomonas putida</i> / BADH*          | Benzaldehyde / NAD <sup>+</sup>      | 63.4          | 137                             | 2160                                                   | McLeish                    |
|                                            | Benzaldehyde / NADP <sup>+</sup>     | 39.9          | 42.5                            | 1,065.16                                               |                            |
| <i>Klebsiella pneumoniae</i> / ALDH        | Isovaleraldehyde / NAD <sup>+</sup>  | 0.21          | 25.47                           | 121.9                                                  | Raj                        |
| <i>Escherichia coli</i> K-12 / AldDH       | Isovaleraldehyde / NAD <sup>+</sup>  | 0.68          | 27.31                           | 40.16                                                  | Mohan (Jo)                 |
|                                            | Benzaldehyde / NADP <sup>+</sup>     | 5.37          | 17.37                           | 3.23                                                   |                            |
| <i>Homo sapiens</i> / ALDH1B1              | Benzaldehyde / NAD <sup>+</sup>      | 0.05          | -                               | -                                                      | Stagos (20616185)          |
| <i>Homo sapiens</i> / ALDH2                | Benzaldehyde / NAD <sup>+</sup>      | 0.000018      | 5.83                            | 323,888.8                                              | Klyosov                    |
| <i>Homo sapiens</i> / ALDH3A1              | Benzaldehyde / NAD <sup>+</sup>      | 0.16          | -                               | -                                                      | Giebułtowiec               |
| <i>Euglena gracilis</i> / ALDH             | Benzaldehyde / NAD <sup>+</sup>      | 0.15          | -                               | -                                                      | Rodriguez – Zavala<br>2006 |
| <i>Ratus norvegicus</i> / ALDH1            | Benzaldehyde / NADP <sup>+</sup>     | 1.6           | -                               | -                                                      | Lindahl, 1984              |

\*(BADH) benzaldehyde dehydrogenase
